# Supplementary material for: Ganoderic acid D prevents oxidative stress‐induced senescence by targeting 14‐3‐3ε to activate CaM/CaMKII/NRF2 signaling pathway in mesenchymal stem cells
Source: PubMed Central journal article supplement (PMC9470892; doi:10.1111/acel.13686), 2022-08-05

# Supplementary Figure\_1.tiff

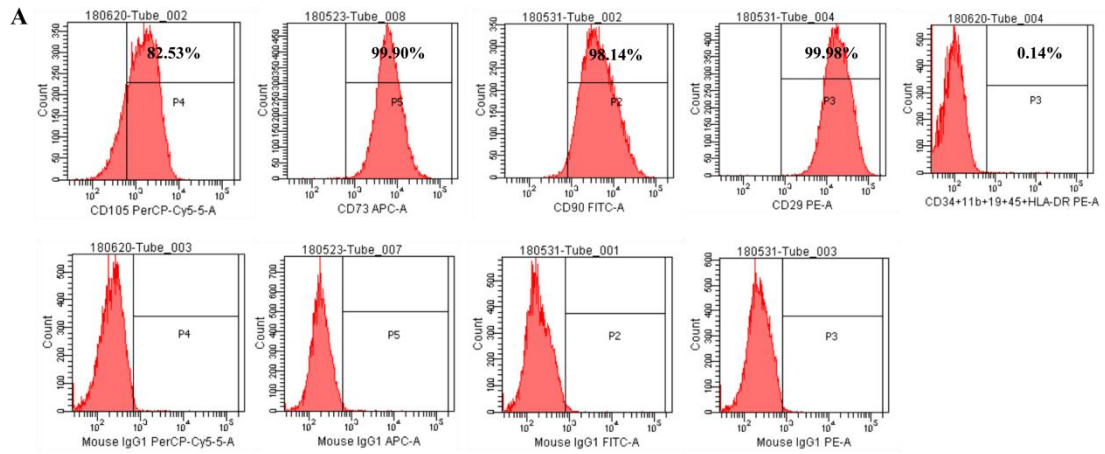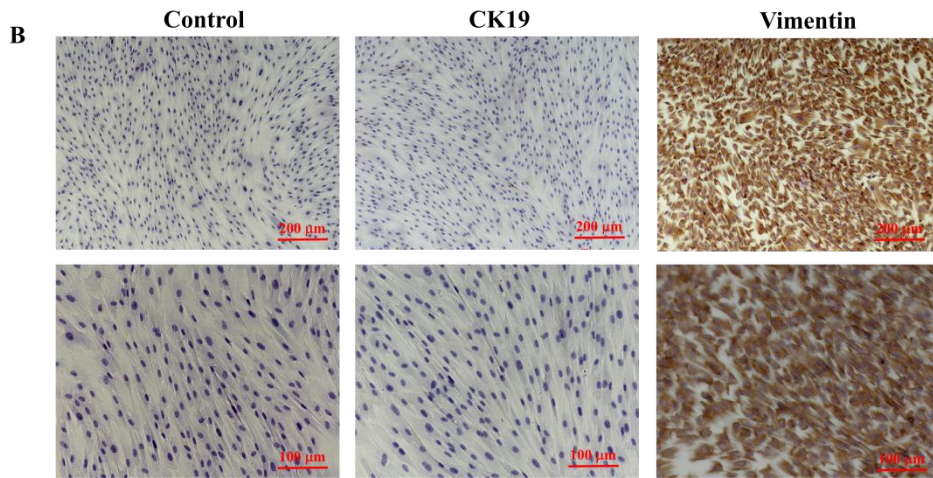

## Supplementary Figure\_2.tiff

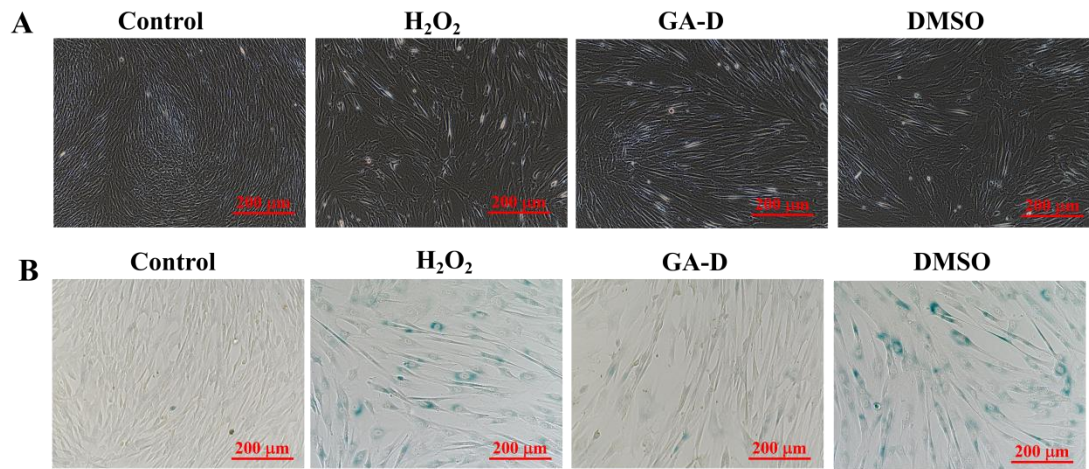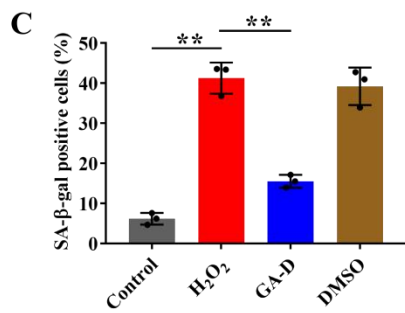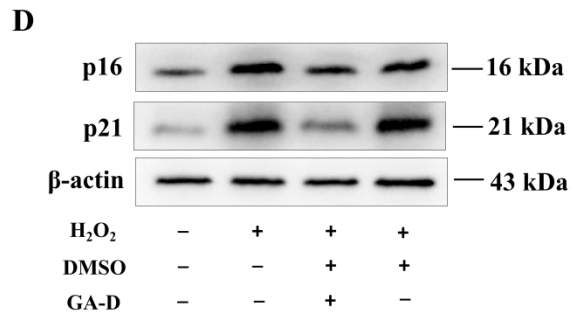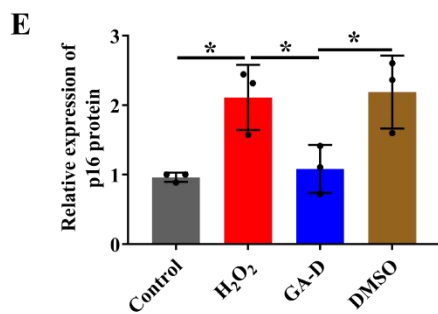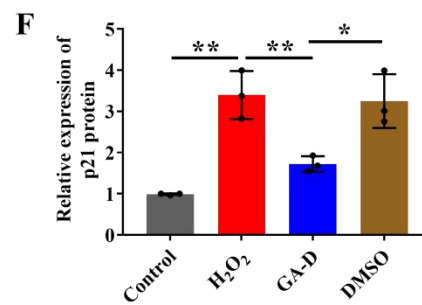

# Supplementary Figure\_3.tiff

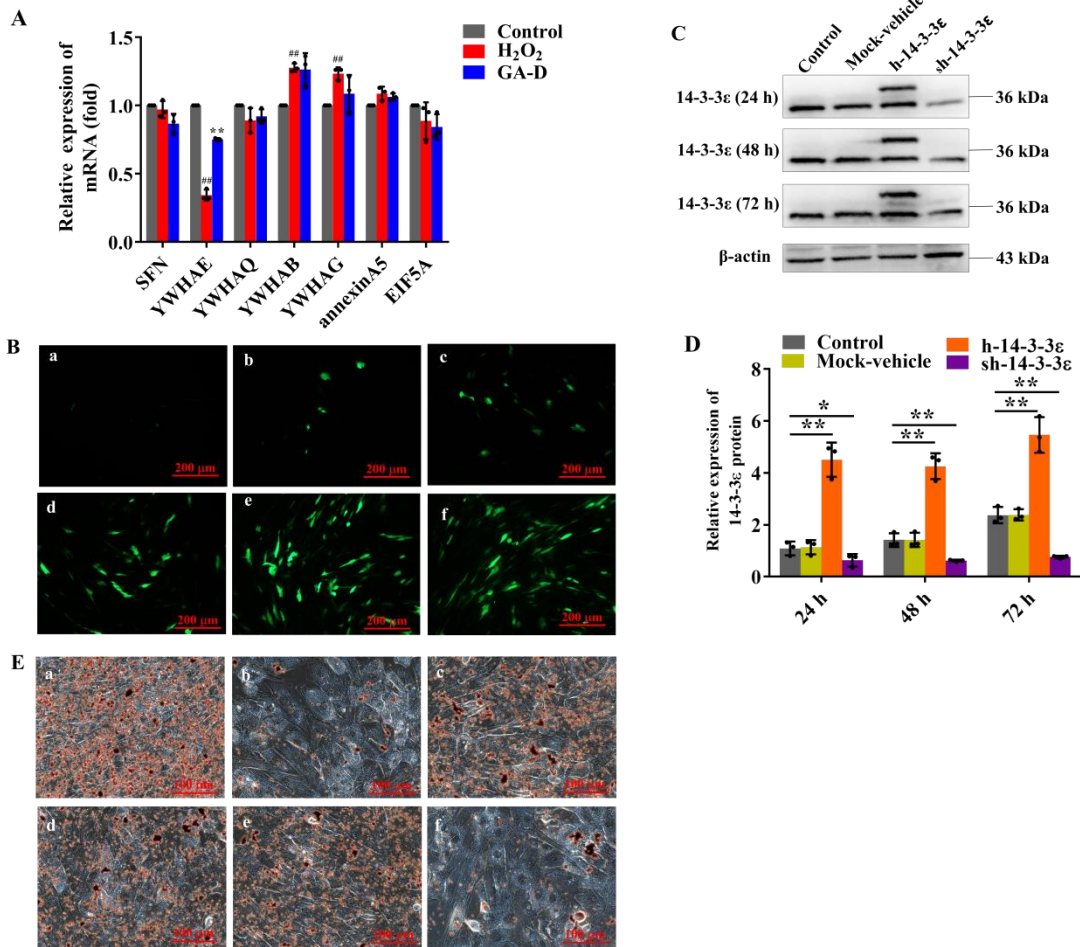

# Supplementary Figure\_4.tif

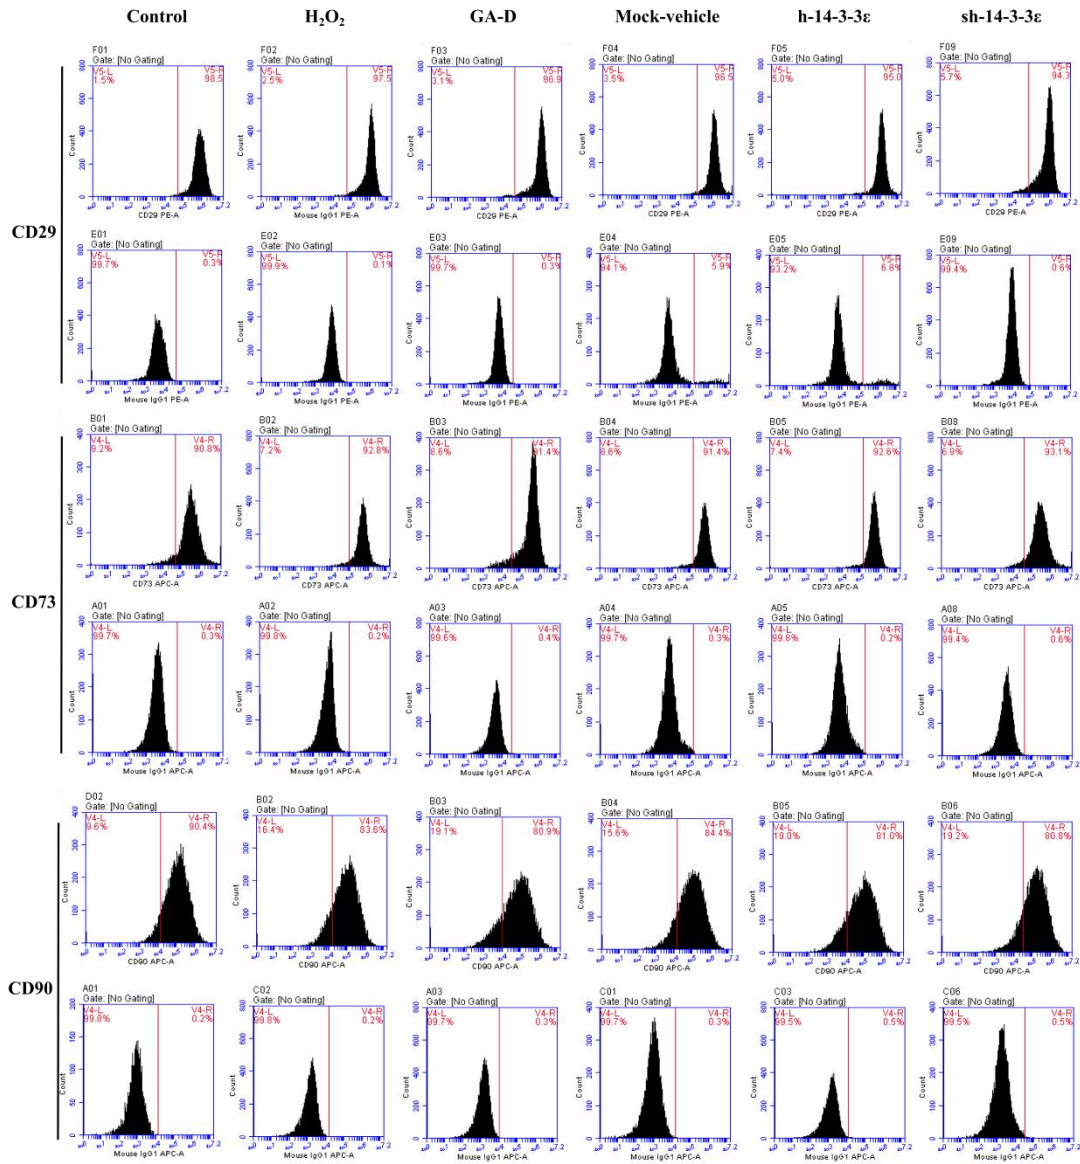

# Supplementary Figure\_5.tiff

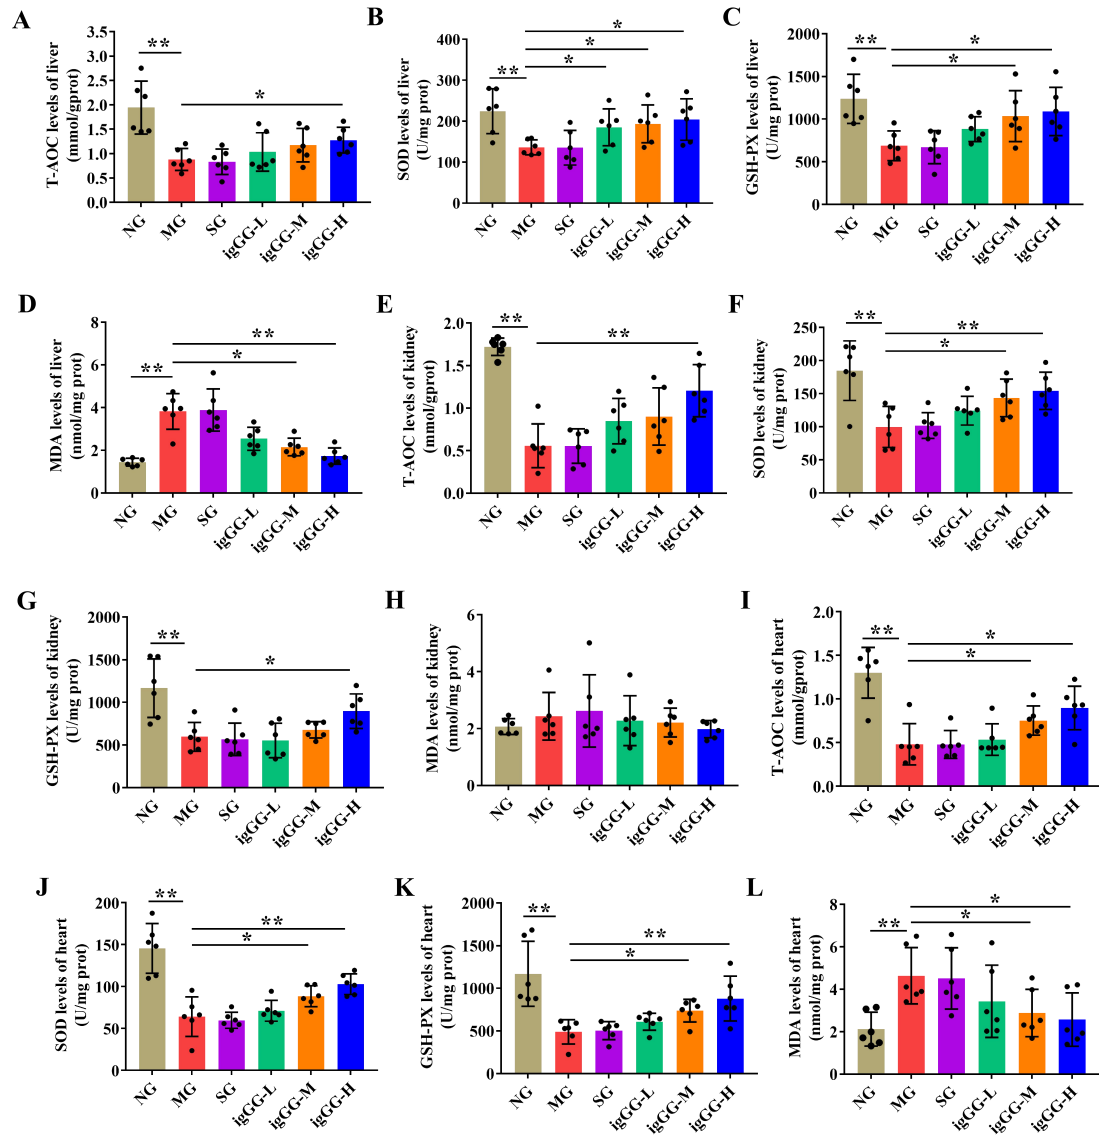

# Supplementary Figure\_6.tiff

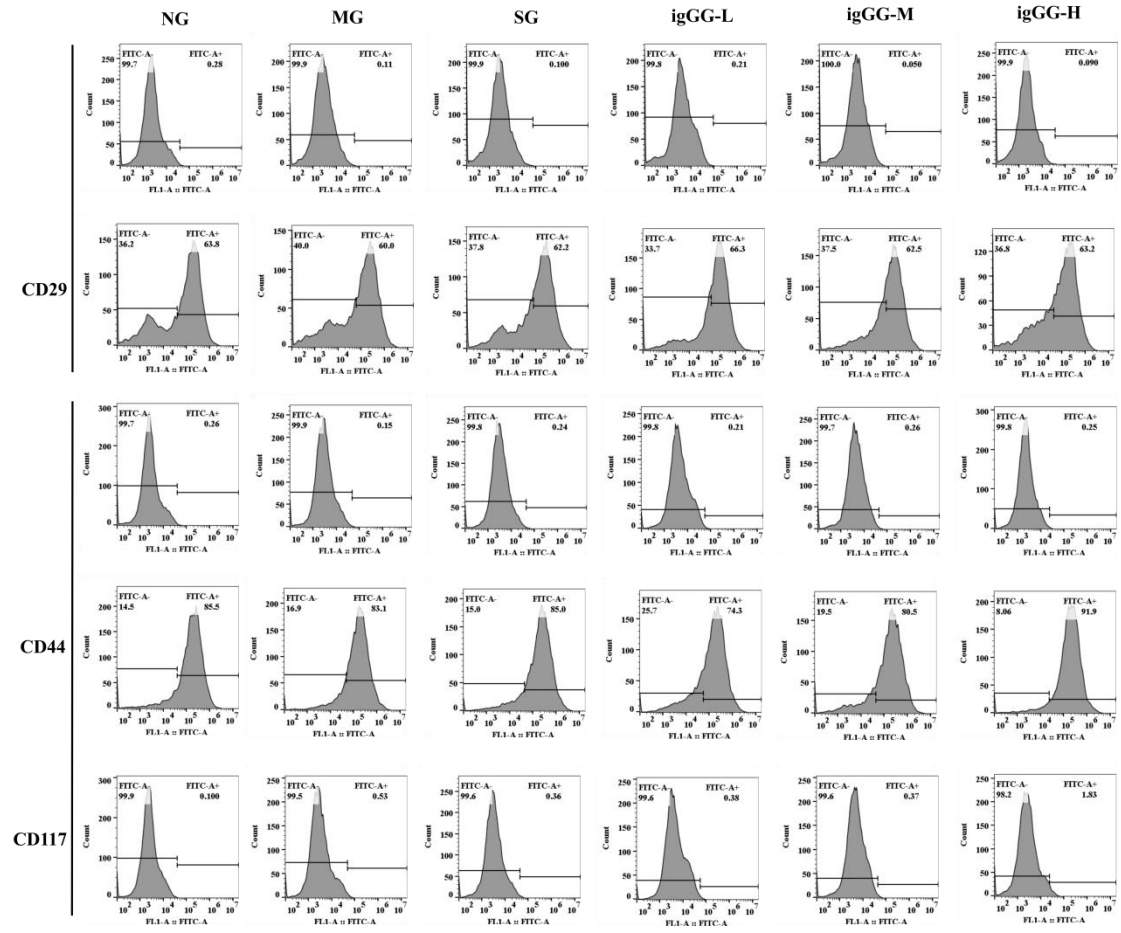

Supplementary Figure\_7.tiff

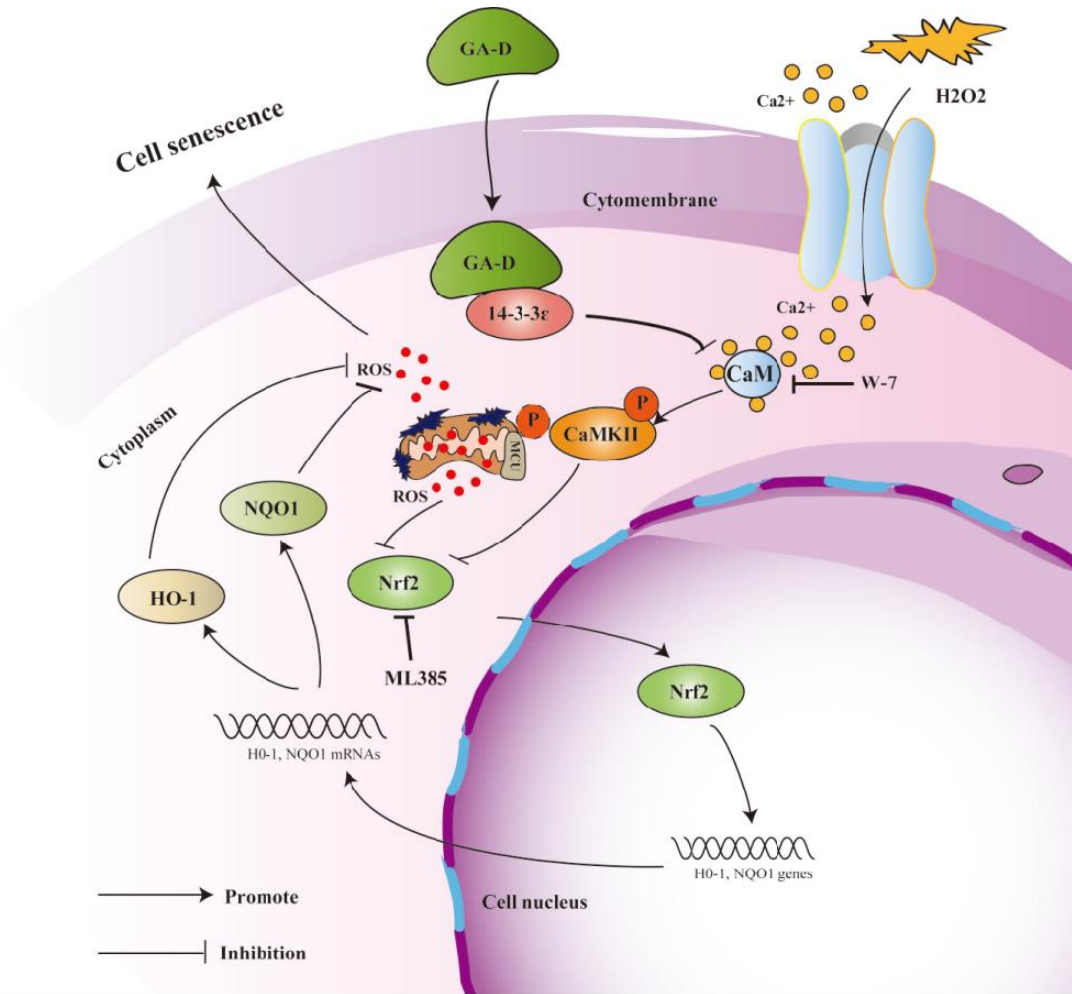

Supplement: ACEL-21-e13686-s001.pdf [file ACEL-21-e13686-s001.pdf]
